### FREEDOM formula: external validation of diabetics treated by coronary artery bypass grafting in single large volume cardio-surgical center

N. Arnautovic<sup>1</sup>, M. Ostojic<sup>2</sup>, D. Nezic<sup>2</sup>, M. Borzanovic<sup>2</sup>, A. Nikolic<sup>2</sup>, T. Ragus<sup>2</sup>, S. Micovic<sup>2</sup>, P. Otasevic<sup>2</sup>, D. Djokic<sup>2</sup>, I. Ivanovic<sup>3</sup>, B. Stanetic<sup>4</sup>, T. Kovacevic-Preradovic<sup>4</sup>, V. Djajic<sup>4</sup>, N. Tasic<sup>2</sup>, M. Bojic<sup>2</sup>

<sup>1</sup>University Belgrade Medical School, Belgrade, Serbia; <sup>2</sup>Institute for Cardiovascular Diseases Dedinja, Belgrade, Serbia; <sup>3</sup>City Institute of Public Health, Institute of Public Health Republic of Serbia, Belgrade, Serbia; <sup>4</sup>University Clinical Centre of the Republic of Srpska, Faculty of Medicine Banja Luka, Banja Luka, Bosnia and Herzegovina

**Funding Acknowledgement:** Type of funding source: Public grant(s) – National budget only. Main funding source(s): Ministry of education, science and technological development, Republic of Serbia

**Background:** Freedom formula (FF) was derived very recently to assist in decision making by Heart Team in patients (Pts) with diabetes (DM) who are in need for myocardial revascularization (Percutaneous Coronary Intervention or Coronary artery bypass grafting (CABG)) due to complex ischemic Heart disease (but without left main stem disease (LM)). In external validation moderate C statistics values were obtained.

**Purpose:** To validate FF predictive value in Pts with DM and more complex patients (three vessel (3VD) and/or LM as well lower left ventricular ejection fraction (LVEF)) than in FREEDOM population.

**Methods:** From our prospective data base of 2455 consecutive pts who had the first isolated CABG in the period 01/2012–12/2014 with 3VD and/or LM with 100% follow up of 4 years All-cause Mortality (Mt) we retrieved 925 pts with DM.

**Results:** DM was present in 925 Pts (Mt: 12.6%). On insulin were 318 (34.3%; Mt 14.5%). We analysed the predicative value of FF in the whole group (925) of pts with DM as well as in subgroups with LM (294) and without LM (631; most similar to original Freedom population), separately. Characteristics of pts, Freedom formula, predicating power by C Statistics, Calibration plots and Brier scores are presented in Picture 1.

**Conclusions:** Our external validation of FF was almost identical as previously published one. Furthermore, the FF may be of value even in pts with LM disease and other vessels involved. Of note our pts as seen by combined LVEF, CICr and LM were sicker than pts in FREEDOM.

**Table 1. Characteristics of 925 isolated CABG pts with DM with 4-year FUP**

|                                                | DM + LM<br>N = 294 pts             | DM without<br>LM: N = 631         | P value |
|------------------------------------------------|------------------------------------|-----------------------------------|---------|
| Age:years (IQR)                                | 66 (61-72)                         | 63 (59-69)                        | < 0.001 |
| Sex / male n (%)                               | 225 (76.5)                         | 458 (72.6)                        | 0.116   |
| Diabetes Mellitus On-Insulin n (%)             | 94 (32.0)                          | 224 (35.5)                        | 0.164   |
| Heredity n (%)                                 | 173 (58.8)                         | 398 (63.1)                        | 0.123   |
| Smoker/smoking history (%)                     | 148 (50.3)                         | 325 (51.5)                        | 0.398   |
| Hypertlipidemia n (%)                          | 249 (84.7)                         | 550 (87.2)                        | 0.179   |
| Hypertension n (%)                             | 274 (93.2)                         | 593 (94.0)                        | 0.373   |
| Chronic obstructive pulmonary disease n (%)    | 7 (2.4)                            | 29 (4.6)                          | 0.071   |
| Peripheral artery disease n (%)                | 68 (23.1)                          | 117 (18.5)                        | 0.063   |
| Recent Myocardial Infarction n(%)              | 75 (25.5)                          | 128 (20.3)                        | 0.045   |
| Neurological dysfunction n(%)                  | 3 (1)                              | 9 (1.4)                           | 0.438   |
| CCS class IV n (%)                             | 46 (15.6)                          | 44 (7.0)                          | < 0.001 |
| NYHA Class                                     |                                    |                                   |         |
| I n (%)                                        | 34 (11.6)                          | 82 (13.0)                         | 0.549   |
| II n (%)                                       | 153 (52.0)                         | 376 (59.6)                        | 0.029   |
| III n (%)                                      | 103 (35.0)                         | 169 (26.8)                        | 0.010   |
| IV n (%)                                       | 4 (1.4)                            | 4 (0.6)                           | 0.218   |
| Left Ventricular Ejection Fraction % (mean±SD) | 42.48 ± 12.57                      | 43.59 ± 11.31                     | 0.200   |
| Body mass index (IQR)                          | 27.4 (24.9-30.11)                  | 27.8 (25.4-30.4)                  | 0.130   |
| Creatinine Clirens ml/min (CrCl) (IQR)         | 83.3 (59.7-102.1)                  | 90.4 (70.4-113.1)                 | < 0.001 |
| Urgence n (%)                                  | 142 (48.3)                         | 116 (18.4)                        | < 0.001 |
| EuroSCORE II (mean±SD)                         | 3.39 ± 3.92                        | 2.33 ± 2.65                       | < 0.001 |
| Four year mortality n(%)                       | 51 (17.3)                          | 66 (10.5)                         | 0.003   |
| FREEDOM score: Mt % (mean±SD;IQR)              | 23.41 ± 16.53; 17.77 (10.63-33.22) | 18.55 ± 12.86; 15.04 (9.61-24.02) | < 0.001 |

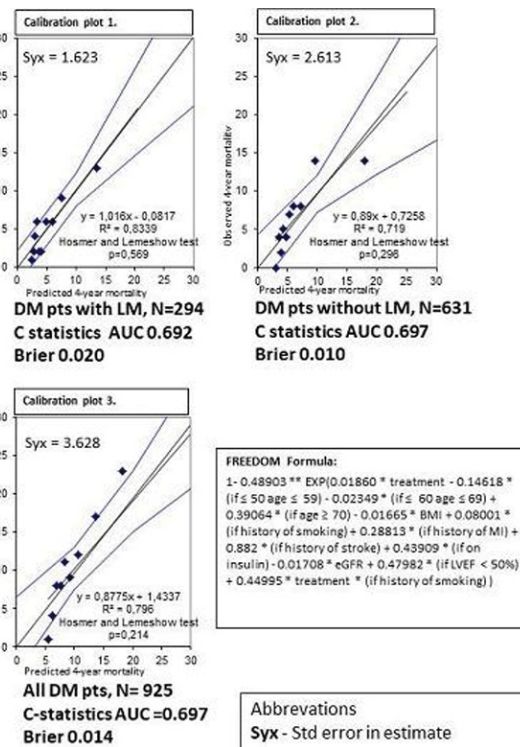

Picture 1
